# Supplementary material
Source: PubMed Central journal article supplement (PMC3536103)
Supplement: AEM.02781-12_zam999103957so1.pdf [file AEM.02781-12_zam999103957so1.pdf]

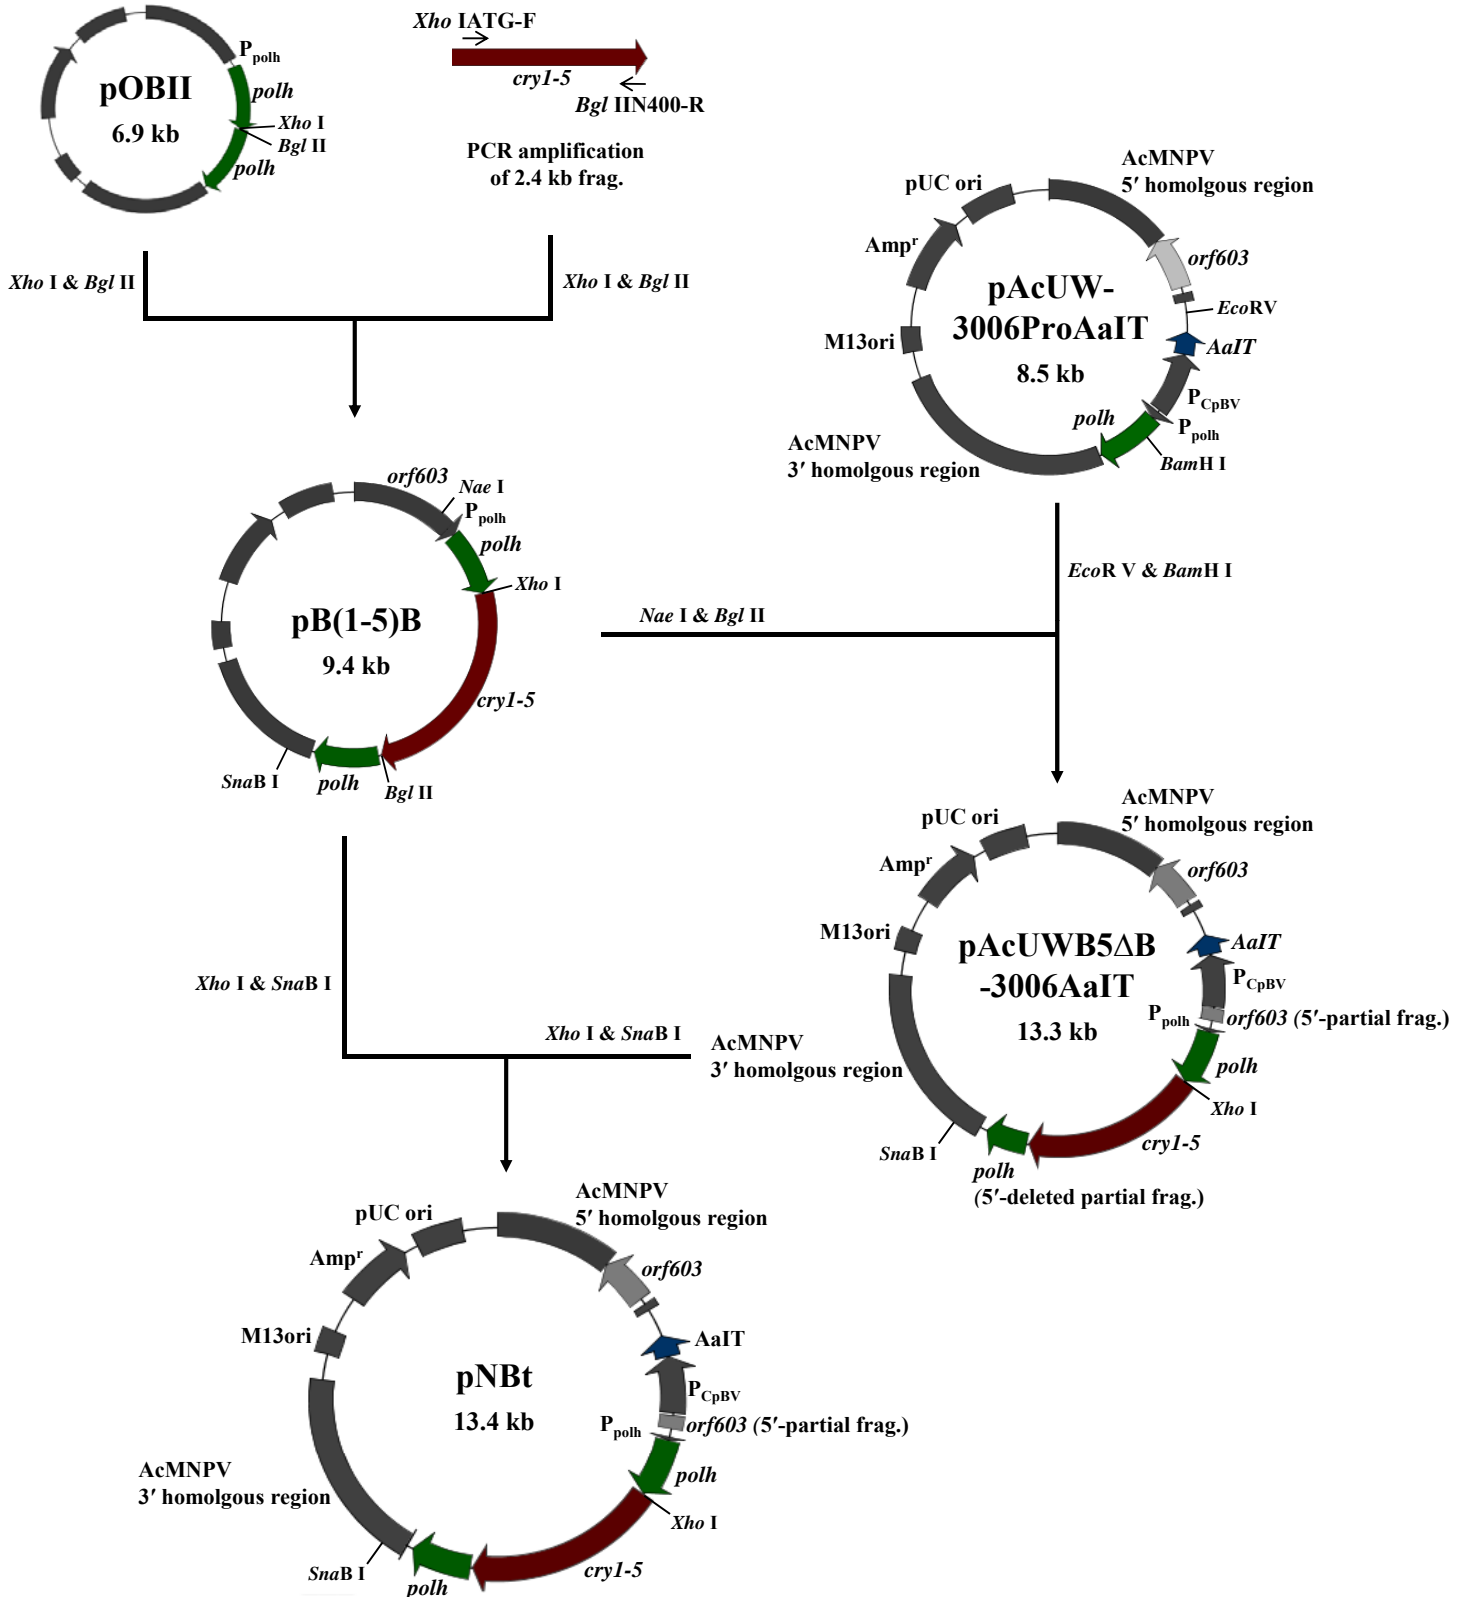

**Fig. S1.** Construction map of the transfer vector, pNBt, used for the production of recombinant baculovirus, NeuroBactrus. AcMNPV 5' homologous region corresponds to +183 ~ +670 bp of the *lef2* orf. AcMNPV 3' homologous region corresponds reverse-complementarily to +1661 ~ +219 bp of the *orf1629* orf.
