# Supplementary material
Source: PubMed Central journal article supplement (PMC3536103)
Supplement: AEM.02781-12_zam999103957so2.pdf [file AEM.02781-12_zam999103957so2.pdf]

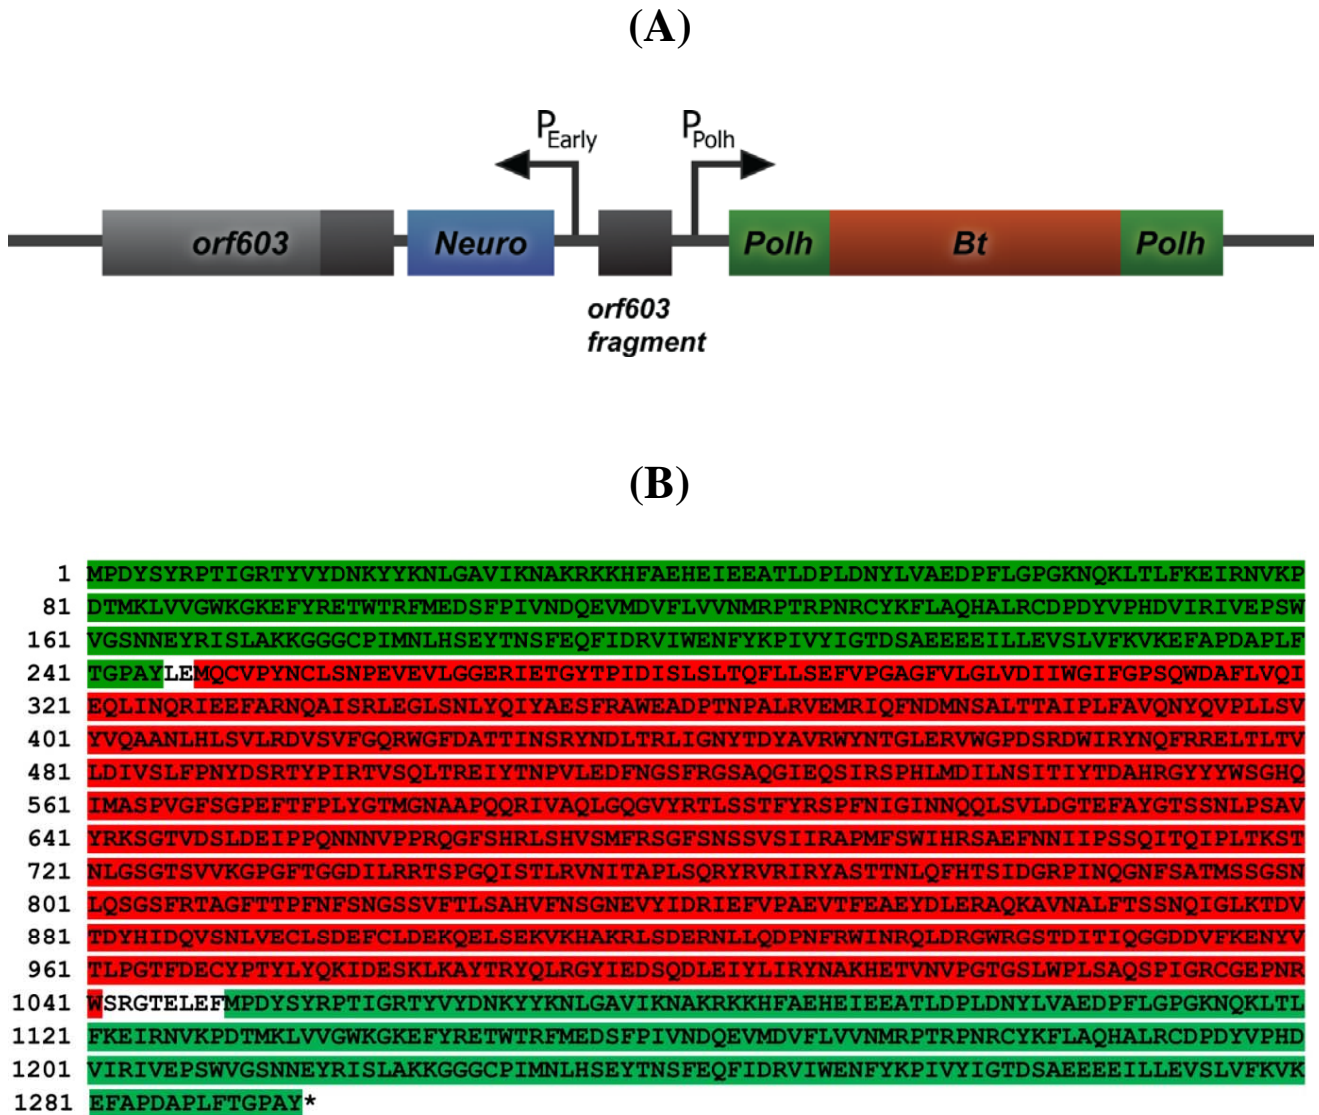

**Fig. S2.** Structure of the transfer vector, pNBt (A), and amino acid sequence of polyhedrin-Cry1-5-polyhedrin fusion protein (B) expressed by recombinant baculovirus, NeuroBactrus. Amino acid sequences for polyhedrin and Cry1-5 were shaded with green and red, respectively.
