# Supplementary material
Source: PubMed Central journal article supplement (PMC3536103)
Supplement: AEM.02781-12_zam999103957so3.pdf [file AEM.02781-12_zam999103957so3.pdf]

**Wt**

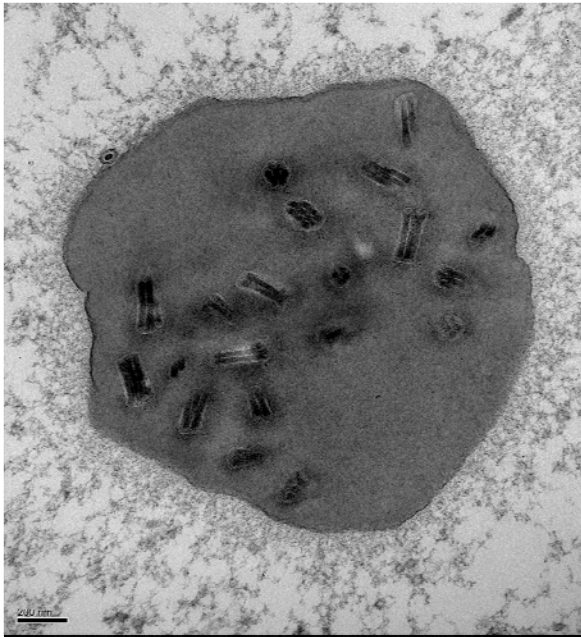

**NBt**

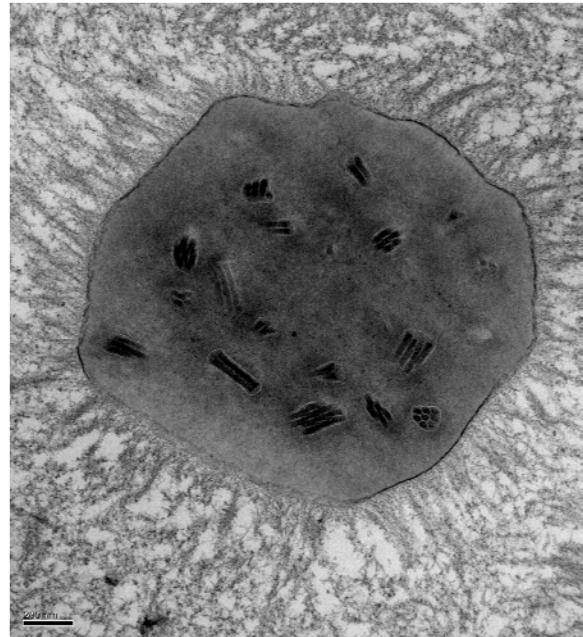

**Fig. S3.** Transmission electron microscopy of polyhedra produced by wild-type AcMNPV (Wt) or NeuroBactrus (NBt). Size bar indicates 200 nm.
