# Supplementary material
Source: PubMed Central journal article supplement (PMC3536103)
Supplement: AEM.02781-12_zam999103957so4.pdf [file AEM.02781-12_zam999103957so4.pdf]

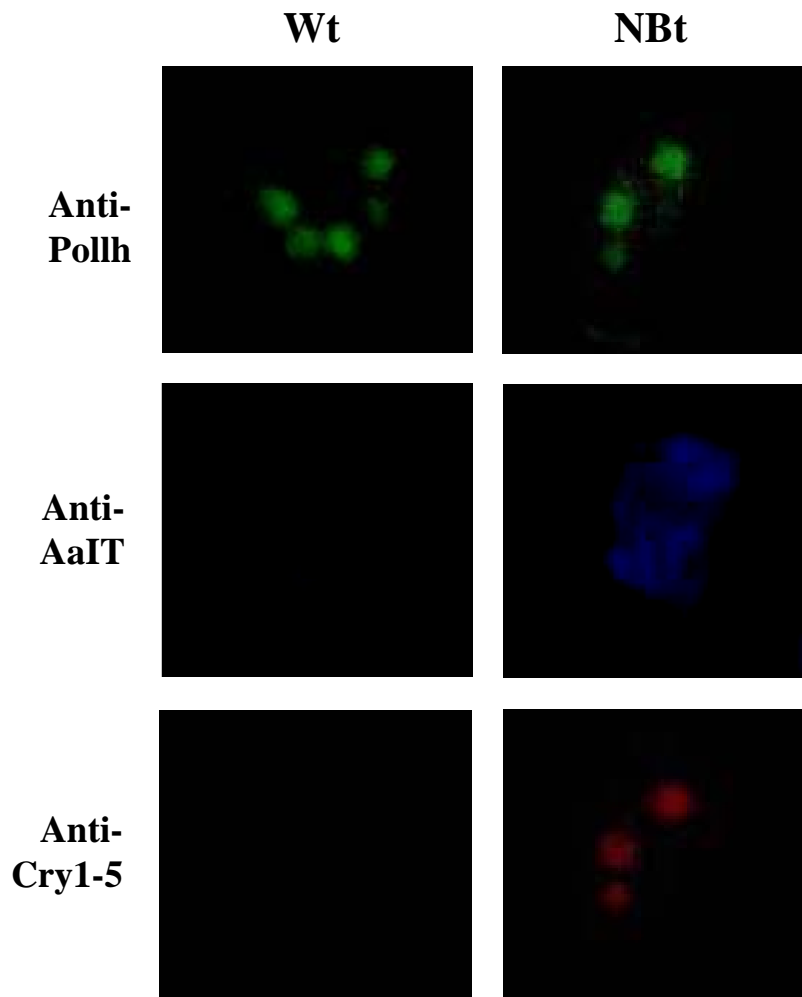

**Fig. S4.** Fluorescence microscopy of Sf9 cells infected with wild-type AcMNPV (Wt) or NeuroBactrus (NBt) at 96 hours post-infection. Anti-polyhedrin antibody (Anti-Polh) was visualized with AlexaFluor<sup>®</sup> 488-conjugated anti-mouse secondary antibody (green), anti-Cry1Ab antibody (Anti-Cry1-5) was visualized with AlexaFluor<sup>®</sup> 568-conjugated anti-rabbit secondary antibody (red) and an anti-AaIT antibody (Anti-AaIT) was visualized with AlexaFluor<sup>®</sup> 350-conjugated anti-sheep secondary antibody (blue).
