# Supplementary material
Source: PubMed Central journal article supplement (PMC3536103)
Supplement: AEM.02781-12_zam999103957so5.pdf [file AEM.02781-12_zam999103957so5.pdf]

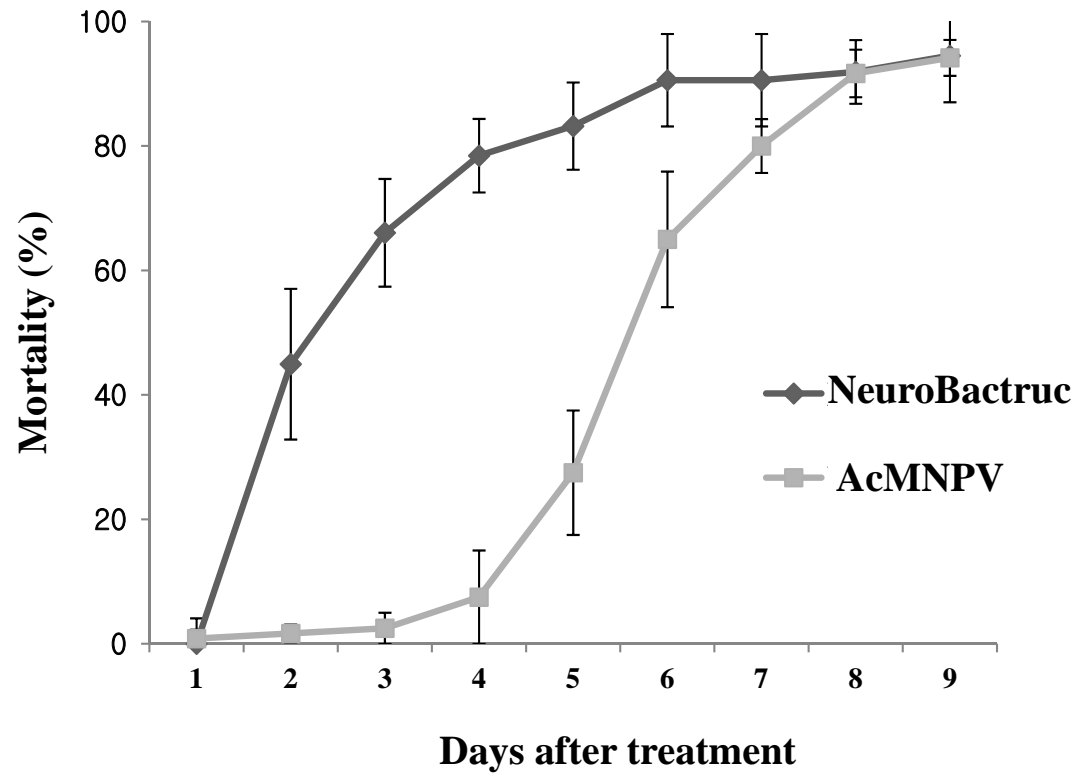

**Fig. S5.** Insecticidal activity of NeuroBactrus against *S. exigua* larvae. One hundred and twenty 2nd instar larvae of *S. exigua* were inoculated at concentration of  $5 \times 10^6$  PIBs/cm<sup>2</sup>.
