# Supplementary material
Source: PubMed Central journal article supplement (PMC3536103)
Supplement: AEM.02781-12_zam999103957so6.pdf [file AEM.02781-12_zam999103957so6.pdf]

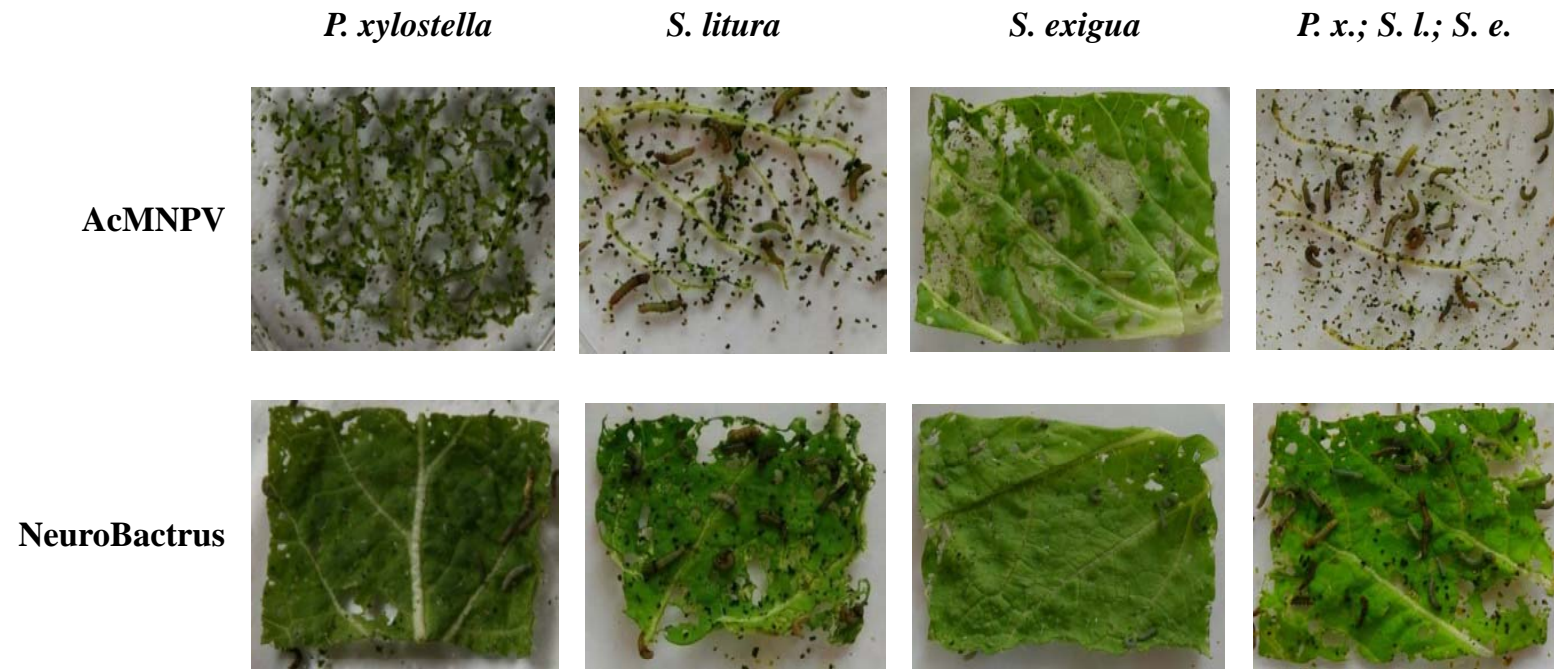

**Fig. S6.** Feeding damages of NeuroBactrus treated-cabbage leafs by *P. xylostella* (*Px*), *S. litura* (*Sl*) and *S. exigua* (*Se*) larvae.
