# Supplementary material
Source: PubMed Central journal article supplement (PMC3536103)
Supplement: AEM.02781-12_zam999103957so7.pdf [file AEM.02781-12_zam999103957so7.pdf]

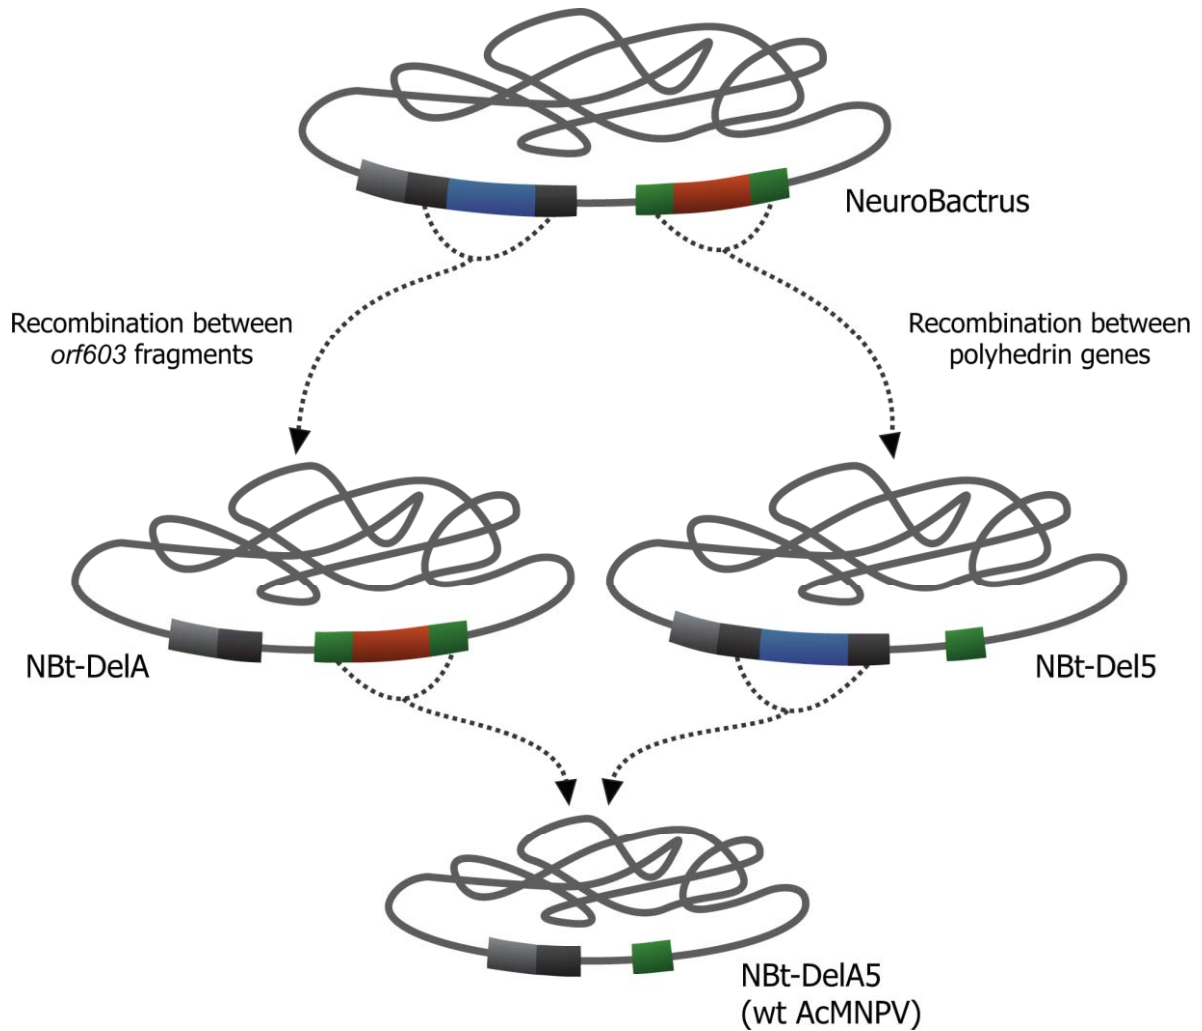

**Fig. S7.** Schematic diagram on recovery of the NeuroBactrus to wild-type. NBt-DelA, *AaIT* deleted recombinant; NBT-Del5, *cry1-5* deleted recombinant; NBt-DelA5, both of *AaIT* and *cry1-5* deleted recombinant.
