# Supplementary material
Source: PubMed Central journal article supplement (PMC3536103)
Supplement: AEM.02781-12_zam999103957so8.pdf [file AEM.02781-12_zam999103957so8.pdf]

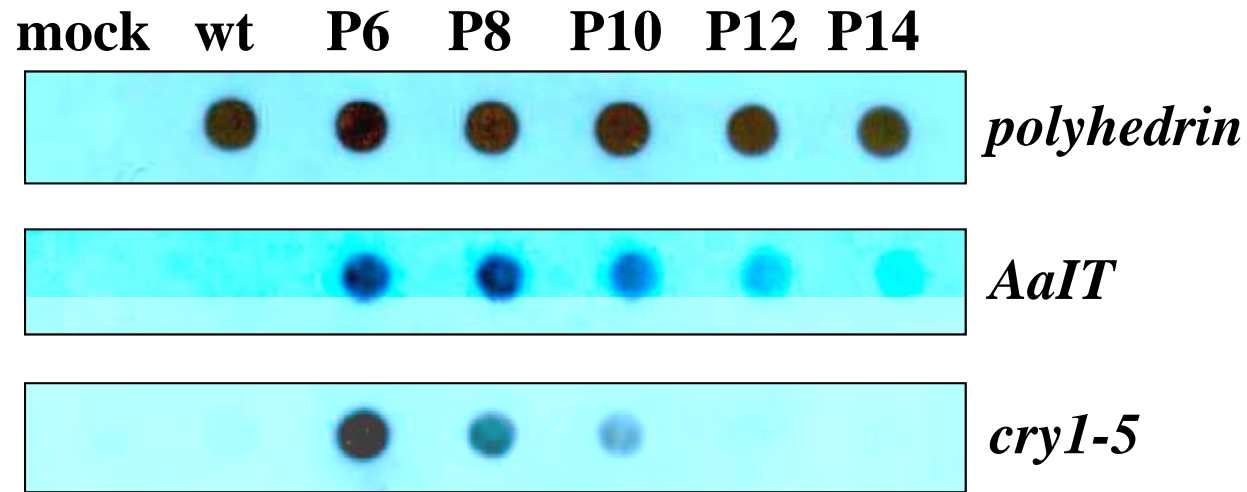

**Fig. S8.** Northern dot blot analysis against the *AaIT* and *cry1-5* transcripts from Sf9 cells infected with serially passed NeuroBactrus. The total RNAs were hybridized with labeled *polyhedrin*, *AaIT* and *cry1-5* gene probe, respectively. Lanes: mock, mock-infected Sf9 cells; wt, Sf9 cells infected with AcMNPV; P6-P14, Sf9 cells infected with NeuroBactrus of corresponding passage numbers.
