# Supplementary material
Source: PubMed Central journal article supplement (PMC3536103)
Supplement: AEM.02781-12_zam999103957so9.pdf [file AEM.02781-12_zam999103957so9.pdf]

**Table S1.** Primer sequences used in quantitative real-time PCR analysis.

| Amplified target  | Primer name | Primer sequence              |
|-------------------|-------------|------------------------------|
| <i>28S rRNA</i>   | Sf28S-F     | 5'-CGACGTTGCTTTTTGATCCT- 3'  |
|                   | Sf28S-R     | 5'-GCAACGACAAGCCATCAGTA- 3'  |
| <i>polyhedrin</i> | AcPol-398F  | 5'-ACAAATTCCTGGCCCAACAC- 3'  |
|                   | AcPol-600R  | 5'-TCCCAGATGACACGATCGAT- 3'  |
| <i>cry1-5</i>     | Cry1-5-252F | 5'-CGCTAGGAACCAAGCCATTT- 3'  |
|                   | Cry1-5-412R | 5'-TAGCGGTTGTAAGGGCACTG- 3'  |
| <i>AaIT</i>       | AaIT-F66    | 5'-CGGCTACGCTGTTGACTCTT- 3'  |
|                   | AaIT-R213   | 5'-TTTTTTGTCGTCGTTTCAGGC- 3' |
